# Supplementary material for: A Comprehensive Sequencing Analysis of Testis-Born miRNAs in Immature and Mature Indigenous Wandong Cattle (Bos taurus)
Source: MDPI journal article supplement (doi:10.3390/genes13122185), 2022-11-23
Supplement: s1 [file s1]

**Figure S1.** The workflow represents the small RNA library construction for the Illumina.

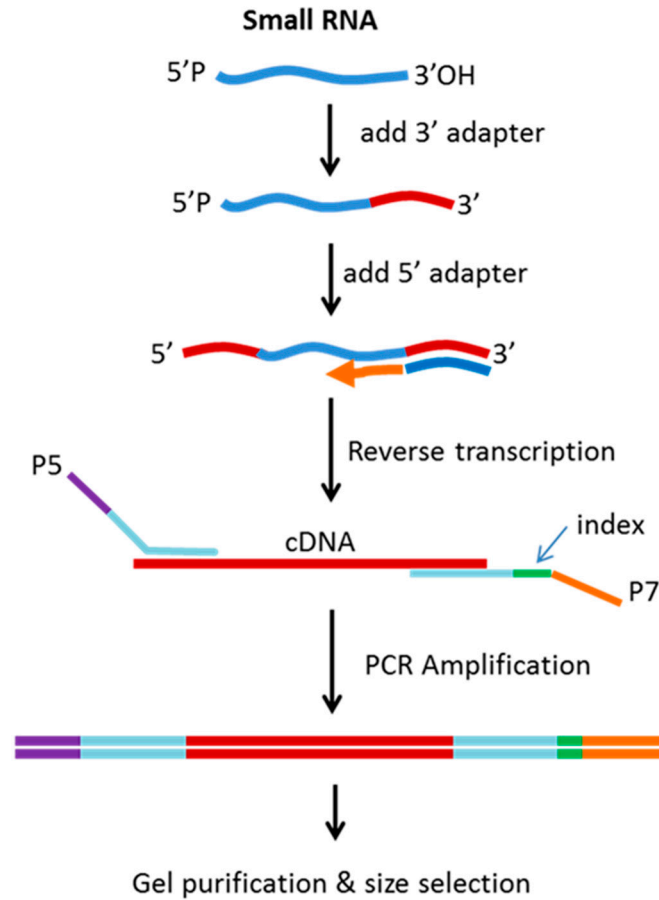

**Figure S2.** Schematic represented the mi-RNAs analysis and adopted route.

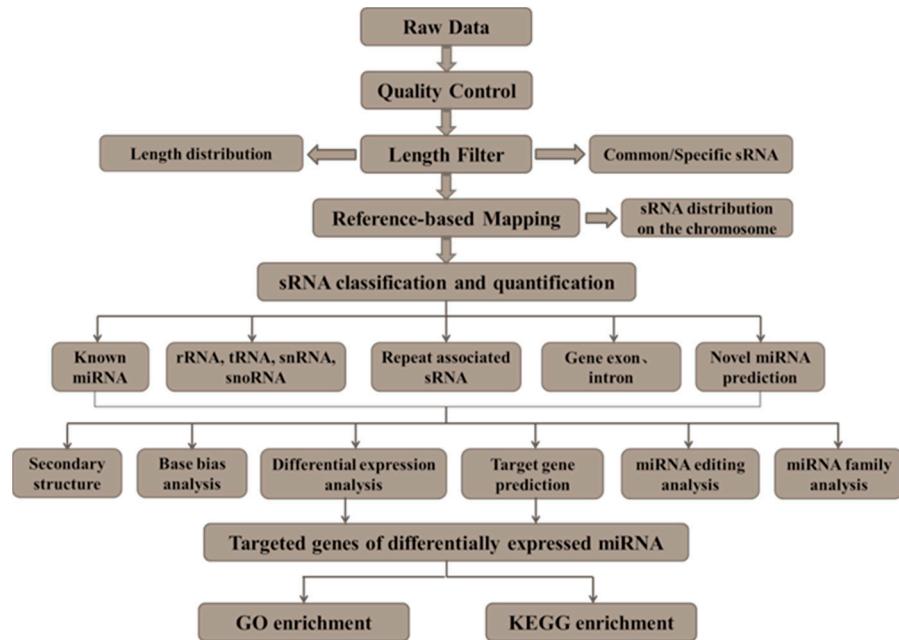

**Table S1.** The total raw reads and classifications of undesirable read.

| Sample | Total-reads           | Containing-N | Low- quality   | 5-adapter con-<br>tamination | 3-adapter-null | Nucleotide bases | Clean reads          |
|--------|-----------------------|--------------|----------------|------------------------------|----------------|------------------|----------------------|
| Bull_2 | 19243007<br>(100.00%) | 0 (0.00%)    | 35234 (0.18%)  | 2793 (0.01%)                 | 53151 (0.28%)  | 89576 (0.47%)    | 19062253<br>(99.06%) |
| Calf_1 | 17862525<br>(100.00%) | 0 (0.00%)    | 80873 (0.45%)  | 3702 (0.02%)                 | 160809 (0.90%) | 15067 (0.08%)    | 17602074<br>(98.54%) |
| Bull_1 | 23004713<br>(100.00%) | 0 (0.00%)    | 98942 (0.43%)  | 3273 (0.01%)                 | 153339 (0.67%) | 110432 (0.48%)   | 22638727<br>(98.41%) |
| Calf_3 | 21796590<br>(100.00%) | 0 (0.00%)    | 132023 (0.61%) | 3717 (0.02%)                 | 223213 (1.02%) | 36314 (0.17%)    | 21401323<br>(98.19%) |
| Calf_2 | 17696661<br>(100.00%) | 0 (0.00%)    | 28895 (0.16%)  | 3592 (0.02%)                 | 101313 (0.57%) | 20338 (0.11%)    | 17542523<br>(99.13%) |
| Bull_3 | 21312453<br>(100.00%) | 0 (0.00%)    | 133560 (0.63%) | 4074 (0.02%)                 | 213242 (1.00%) | 145994 (0.69%)   | 20815583<br>(97.67%) |
